# Supplementary material for: Mechanism of catalytic ozonation in different surface acid sites of oxide aqueous suspensions
Source: Royal Society of Chemistry journal article supplement (doi:10.1039/d3en00331k), 2023-01-01
Supplement: d3en00331k1.pdf [file d3en00331k1.pdf]

*Supporting Information*

**Mechanism of catalytic ozonation in different surface acid sites of oxides aqueous suspension**

Jishuai Bing<sup>a, b, c, d</sup>, Yuankai Xu<sup>a, b, c</sup>, Congyu Wu<sup>a, b, c</sup>, Xiufeng Lv<sup>e</sup>, Xin Xiao<sup>a, b, c, \*</sup>, and Li Chen<sup>a, b, c</sup>,

\*

a. Jiangsu Key Laboratory of Marine Bioresources and Environment, Jiangsu Ocean University, 59 Cangwu Road, Haizhou, Lianyungang, 222005, China.

b. Co-Innovation Center of Jiangsu Marine Bio-industry Technology, Jiangsu Ocean University, 59 Cangwu Road, Haizhou, Lianyungang, 222005, China.

c. Jiangsu Institute of Marine Resources Development, 59 Cangwu Road, Haizhou, Lianyungang, 222005, China.

d. Lianyungang Environmental Science and Technology Service Center, Lianyungang, 222005, China.

e. BaoXianLe Supply Chain Co., Ltd.

The Supporting Information contains 13 pages, 9 Figures and 1 Table.

**Table S1** Main products in  $\gamma$ -Al<sub>2</sub>O<sub>3</sub> catalytic ozonation of ibuprofen at 5 min and 20 min of reaction time.

**Ibuprofen (Reaction 5 min)**

| Retention time/min                                                       | Products                        | Molecular structure                                                                   |
|--------------------------------------------------------------------------|---------------------------------|---------------------------------------------------------------------------------------|
| Main products in the aqueous solution                                    |                                 |                                                                                       |
| 9.71                                                                     | 2-oxopropanoic acid             | 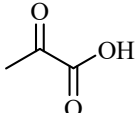   |
| 11.53                                                                    | 2-hydroxy-3-methylbutanoic acid |    |
| 26.67                                                                    | propane-1,2,3-triol             |    |
| 33.51                                                                    | 4-isobutylphenol                |   |
| 36.93                                                                    | 4-isobutylbenzoic acid          |  |
| 42.09                                                                    | ibuprofen                       |  |
| Main products on the surface of $\gamma$ -Al <sub>2</sub> O <sub>3</sub> |                                 |                                                                                       |
| 7.77                                                                     | oxalic acid                     |  |
| 13.84                                                                    | malonic acid                    |  |
| 17.86                                                                    | 3-methyl-2-oxobutanoic acid     |  |
| 28.92                                                                    | maleic acid                     |  |

|       |                              |                                                                                     |
|-------|------------------------------|-------------------------------------------------------------------------------------|
| 32.29 | 4-hydroxybenzoic acid        | 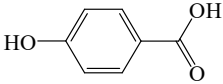 |
| 35.46 | 3,4,5-trihydroxybenzoic acid |  |
| 42.09 | ibuprofen                    |  |

### Ibuprofen (Reaction 20 min)

| Retention time/min                                                       | Products                                     | Molecular structure                                                                   |
|--------------------------------------------------------------------------|----------------------------------------------|---------------------------------------------------------------------------------------|
| Main products in the aqueous solution                                    |                                              |                                                                                       |
| 7.77                                                                     | oxalic acid                                  | 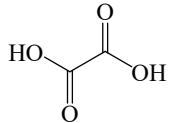   |
| 15.18                                                                    | 2-methylpropan-1-ol                          |   |
| 16.86                                                                    | 2-hydroxyacetic acid                         |  |
| 26.68                                                                    | propane-1,2,3-triol                          |  |
| Main products on the surface of $\gamma$ -Al <sub>2</sub> O <sub>3</sub> |                                              |                                                                                       |
| 11.53                                                                    | 2-hydroxy-3-methylbutanoic acid              |  |
| 28.92                                                                    | maleic acid                                  |  |
| 29.68                                                                    | 2,3,4,5,6-pentahydroxycyclohexanone          |  |
| 38.95                                                                    | 2-(3,4-dihydroxyphenyl)-2-hydroxyacetic acid |  |

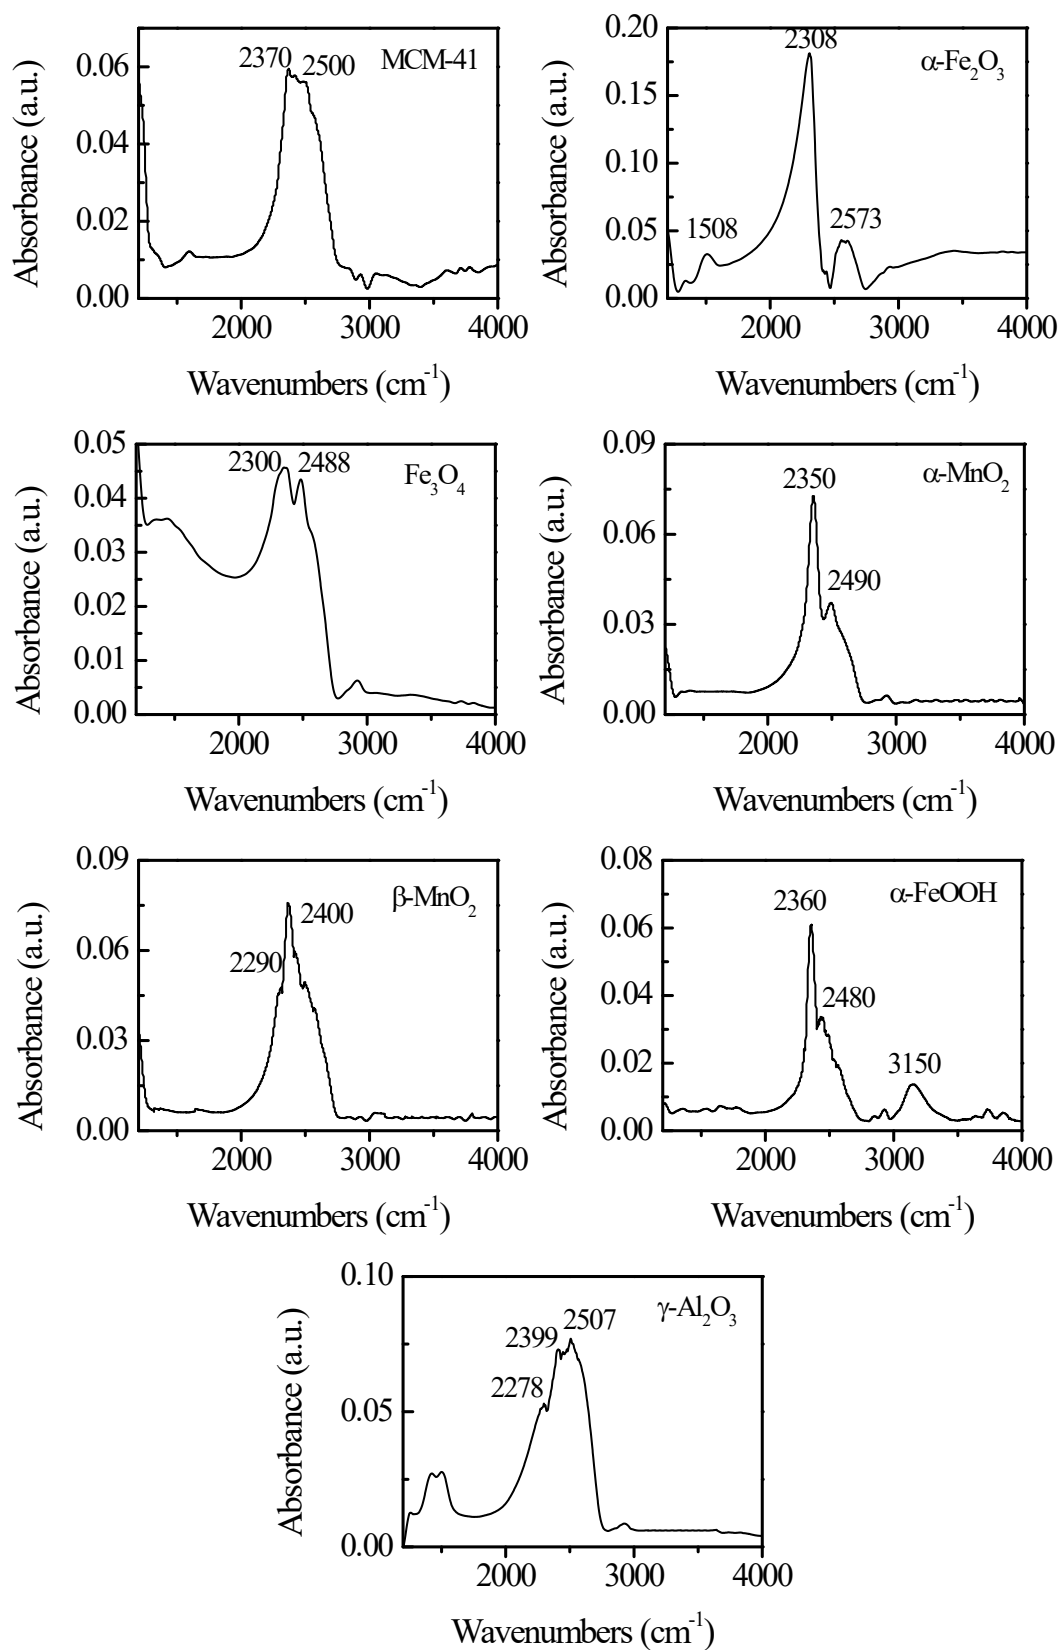

**Fig. S1** ATR-FTIR spectra of different catalyst suspensions in D<sub>2</sub>O. (Catalyst concentration: 100 g L<sup>-1</sup>, pD: 7.0).

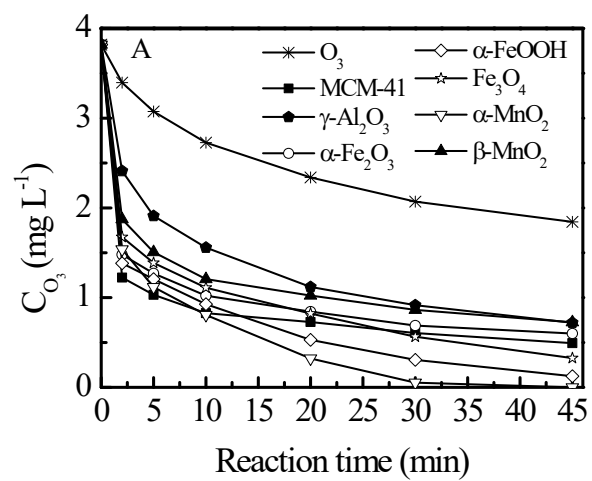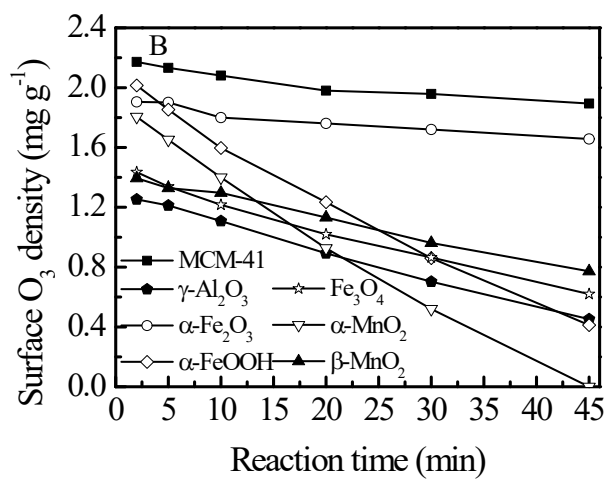

**Fig. S2** The changes of ozone concentration in bulk water (A) and the adsorbed ozone onto catalysts (B) during the decomposition of ozone in aqueous dispersions of various catalysts. (Catalyst dose: 1.5 g L<sup>-1</sup>, initial ozone concentration in water: 3.82 mg L<sup>-1</sup>, initial pH: 7.0).

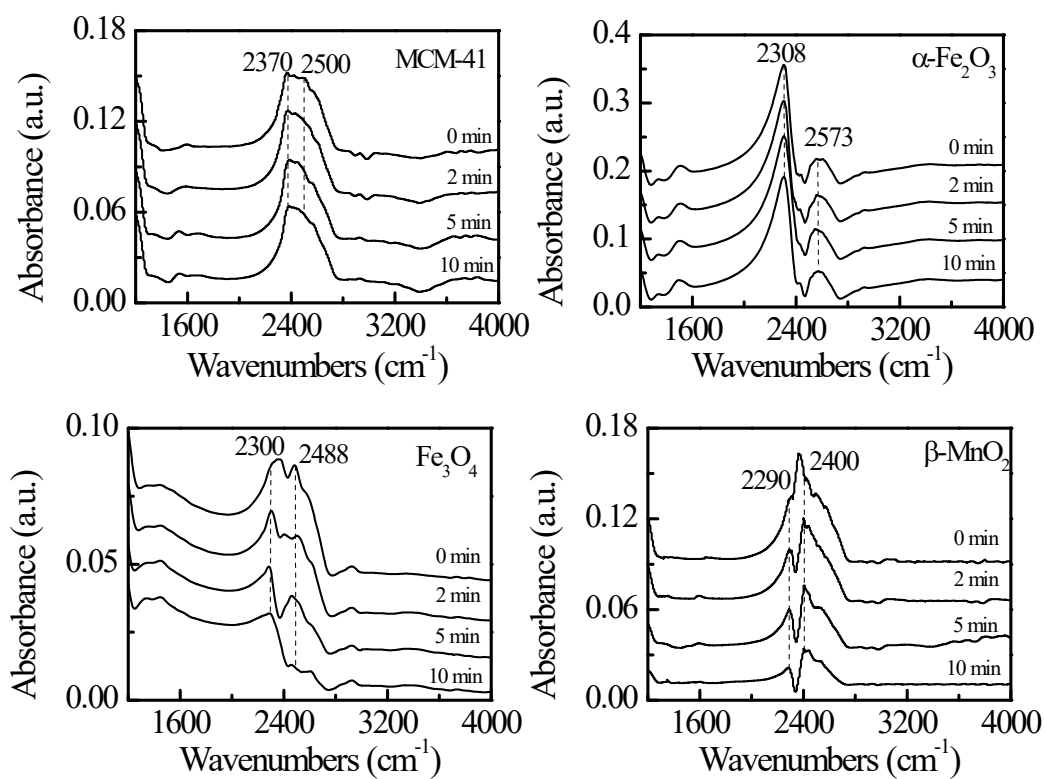

**Fig. S3** ATR-FTIR spectra of different catalysts suspended in D<sub>2</sub>O bubbling ozone for different time.

(Gaseous ozone concentration: 30 mg L<sup>-1</sup>, catalyst dose: 100 g L<sup>-1</sup>, pD: 7.0).

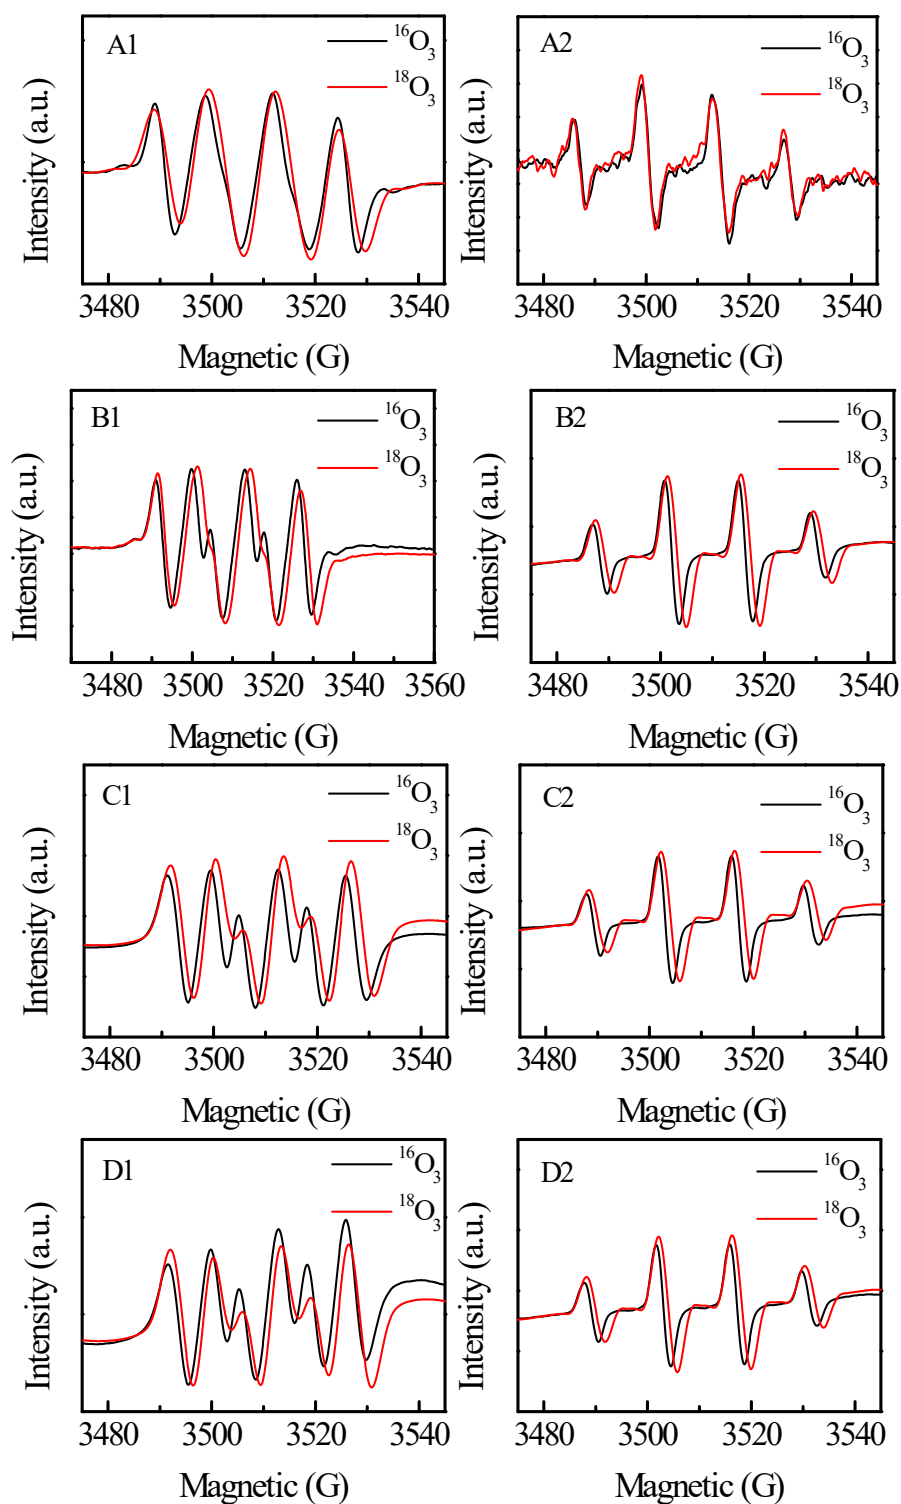

**Fig. S4** BMPO spin-trapping ESR spectra of  $O_3$  alone (A),  $Fe_3O_4$  (B),  $\alpha$ - $MnO_2$  (C) and  $\beta$ - $MnO_2$  (D) recorded in methanol dispersion for  $BMPO\text{-}HO_2^*/O_2^*$  (A1, B1, C1 and D1) and aqueous dispersion for  $BMPO\text{-}^*OH$  (A2, B2, C2 and D2) with  $^{16}O_3$  or  $^{18}O_3$ . (Initial pH: 7.0, catalyst concentration: 10 g  $L^{-1}$ , initial ozone concentration in water: 3.82 mg  $L^{-1}$ , initial BMPO concentration: 25 mM).

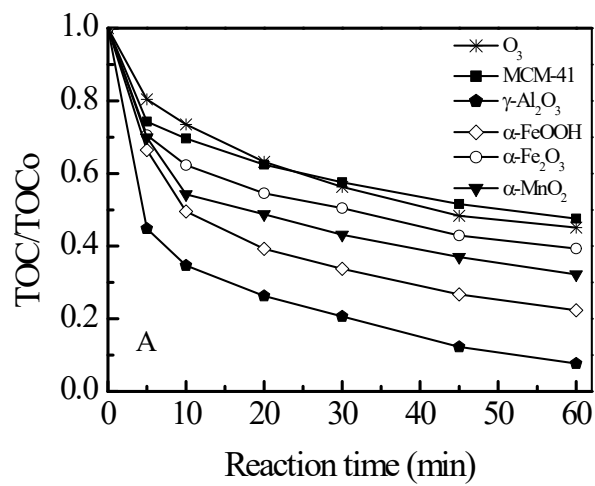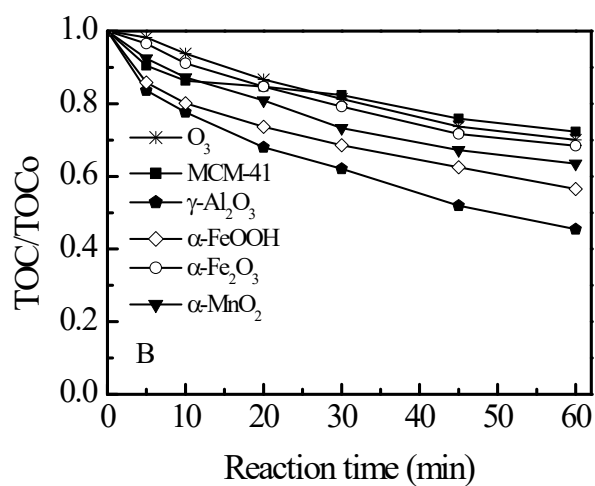

**Fig. S5** Catalytic ozonation of humic acid (A) and acyclovir (B) in various suspensions. (Initial pH: 7.0, initial acyclovir or humic acid concentration: 10 mg L<sup>-1</sup>, catalyst concentration: 1.5 g L<sup>-1</sup>, gaseous ozone concentration: 30 mg L<sup>-1</sup>).



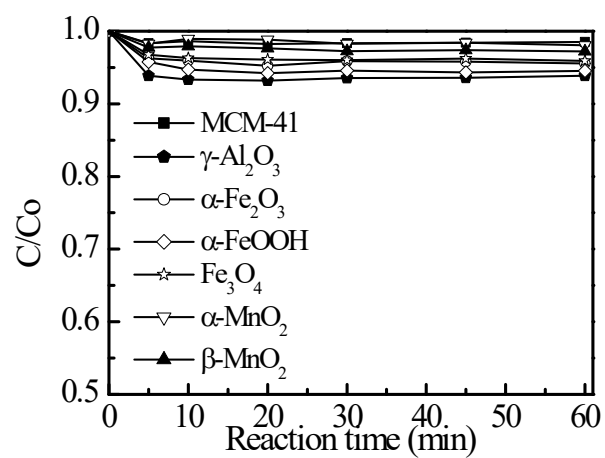

**Fig. S6** Comparison of IBU removal by adsorption processes in various suspensions. (Initial pH: 7.0, initial IBU concentration: 10 mg L<sup>-1</sup>, catalyst concentration: 1.5 g L<sup>-1</sup>).

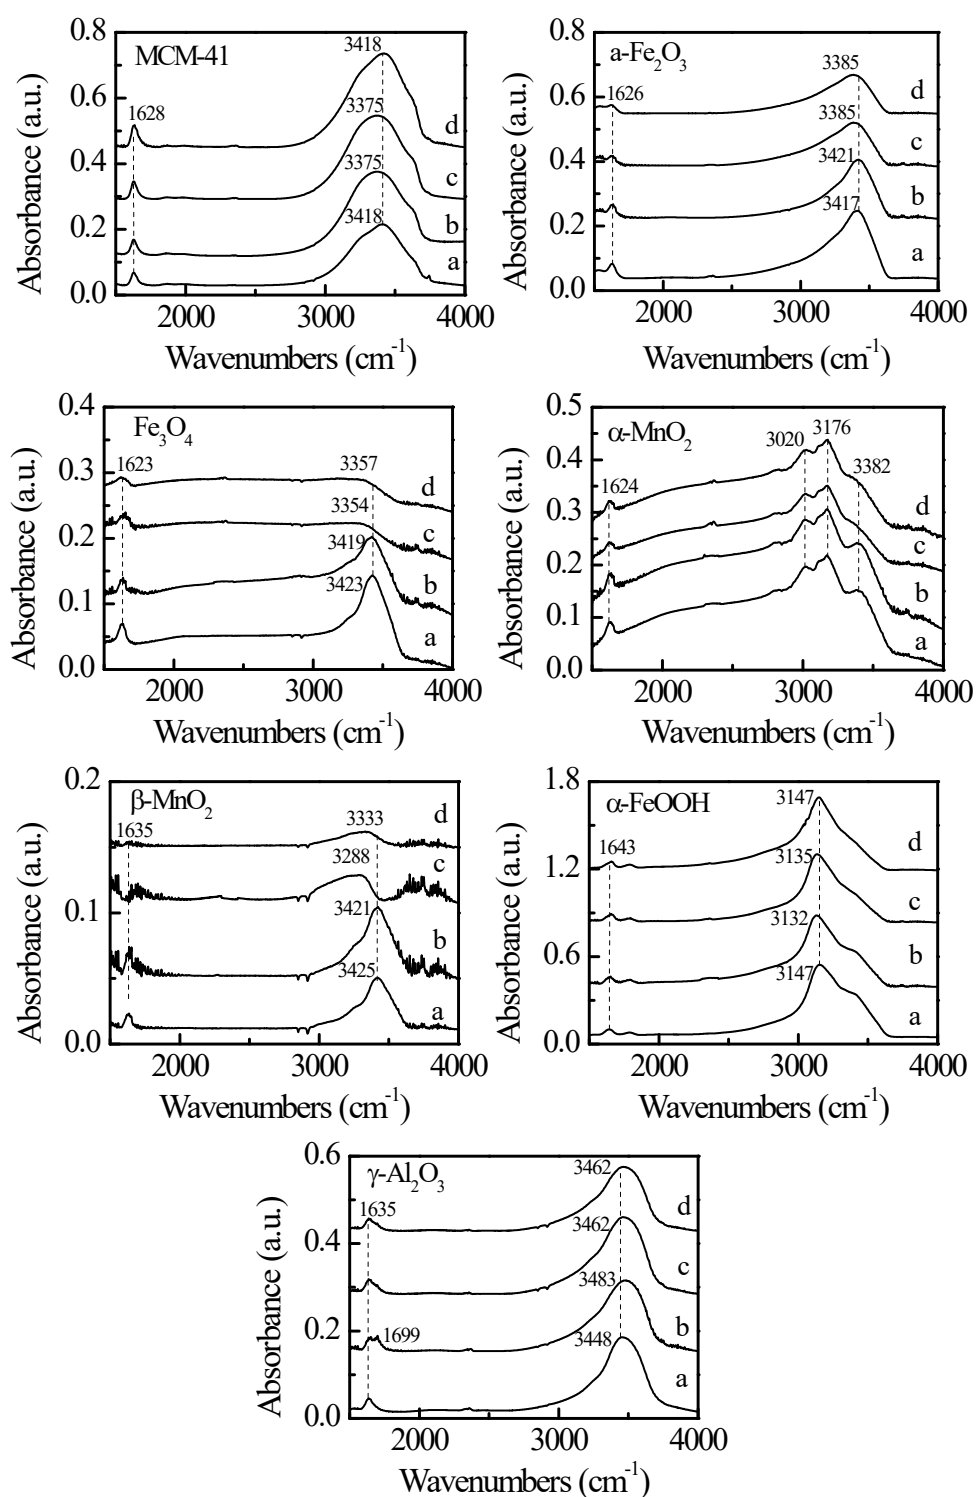

**Fig. S7** FTIR spectra for various samples: (a) fresh catalyst, (b) catalyst adsorbed IBU, (c) catalyst used for 20 min and (d) catalyst used for 60 min in the catalytic ozonation reaction with IBU. (Initial pH: 7.0, initial IBU concentration: 10 mg L<sup>-1</sup>, catalyst concentration: 1.5 g L<sup>-1</sup>, gaseous ozone concentration: 30 mg L<sup>-1</sup>).

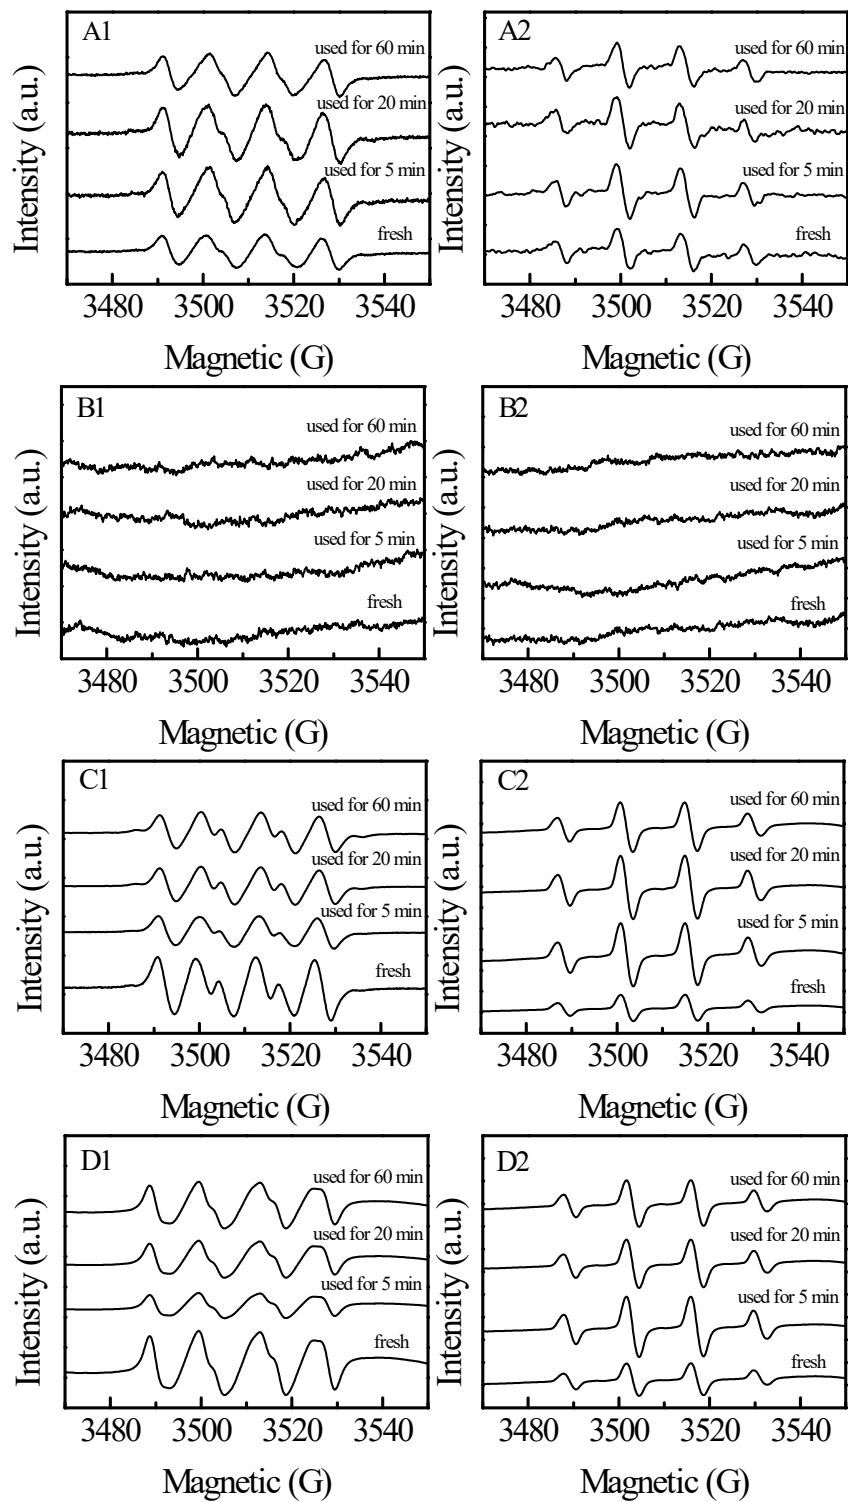

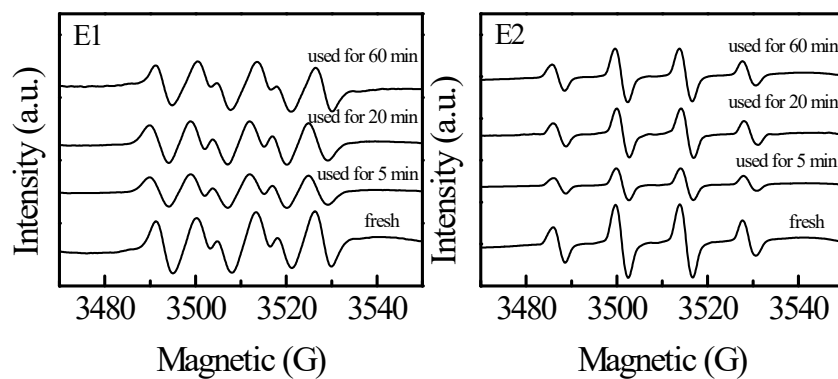

**Fig. S8** BMPO spin trapping EPR spectra for various MCM-41 (A),  $\alpha$ - $\text{Fe}_2\text{O}_3$  (B),  $\text{Fe}_3\text{O}_4$  (C),  $\alpha$ - $\text{MnO}_2$  (D) and  $\beta$ - $\text{MnO}_2$  (E) samples with  $\text{O}_3$  recorded in methanol dispersion for  $\text{BMPO}\text{-HO}_2^\bullet/\text{O}_2^{\bullet-}$  (A1, B1, C1, D1 and E1) and aqueous dispersion for  $\text{BMPO}\text{-}\bullet\text{OH}$  (A2, B2, C2, D2 and E2). (Initial pH: 7.0, catalyst concentration:  $10 \text{ g L}^{-1}$ , initial BMPO concentration: 25 mM, recording time: 3 min).

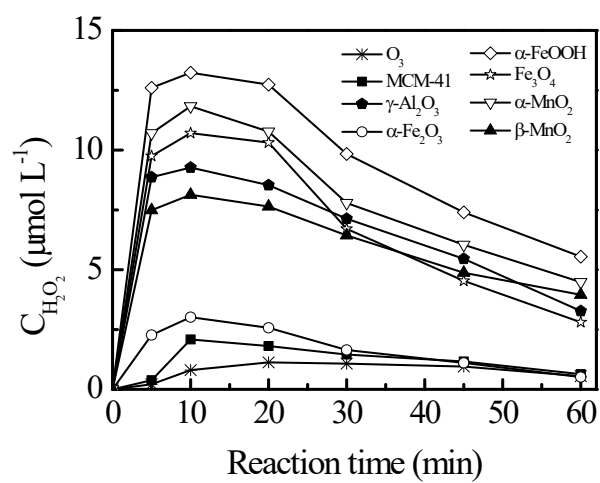

**Fig. S9** The formation of H<sub>2</sub>O<sub>2</sub> during catalytic ozonation of IBU in aqueous dispersions of different catalysts. (Initial pH: 7.0, initial IBU concentration: 10 mg L<sup>-1</sup>, catalyst concentration (if use): 1.5 g L<sup>-1</sup>, gaseous ozone concentration: 30 mg L<sup>-1</sup>).
